# Supplementary material for: Measurement of Fitness and Predatory Ability of Four Predatory Mite Species in Tibetan Plateau under Laboratory Conditions
Source: MDPI journal article supplement (doi:10.3390/insects15020119), 2024-02-06
Supplement: s1 [file s1]

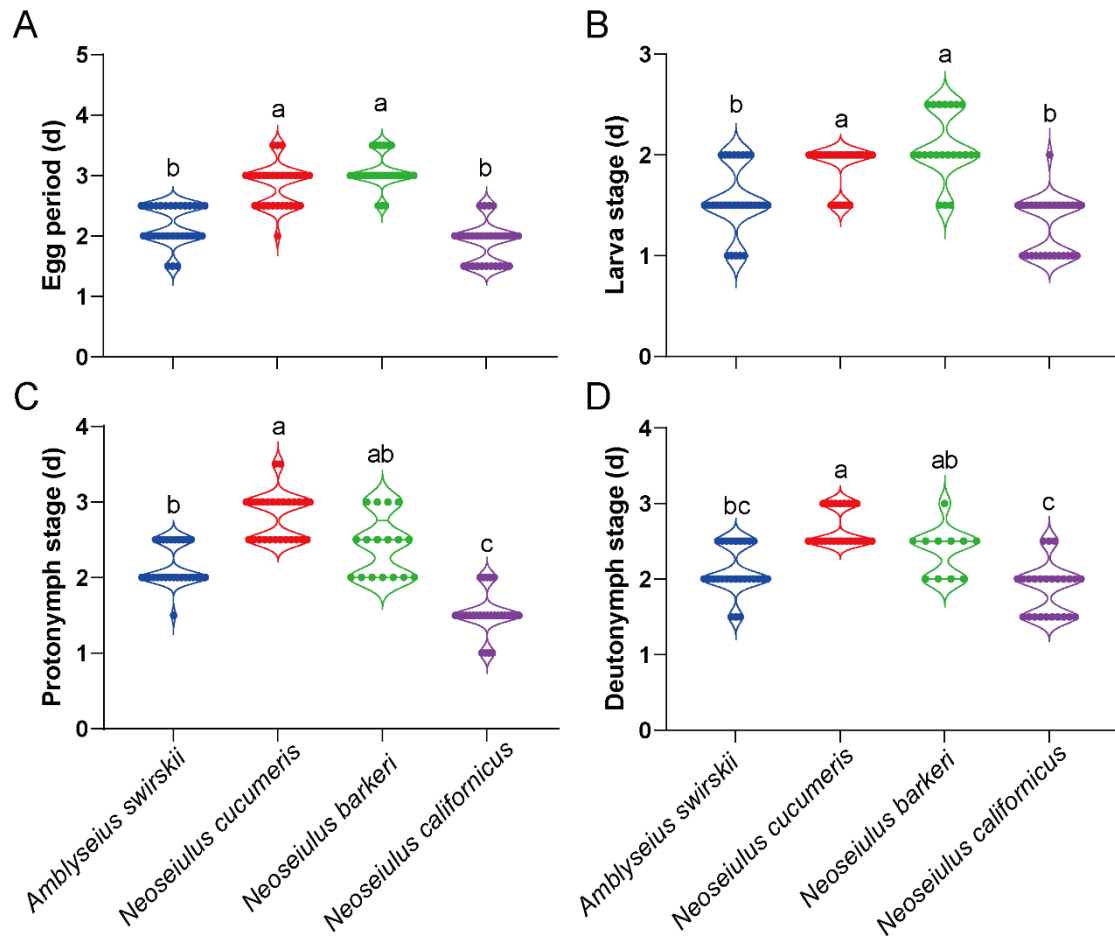

**Figure S1.** Developmental time of different growth stages of four predatory mite species in Tibetan Plateau, the egg period (A), larva stage (B), protonymph stage (C) and deutonymph stage (D) were listed, respectively. The same letters above columns represent homogeneous groups in post-hoc tests ( $P > 0.05$ ) following an ANOVA.

**Table S1.** Parameter estimates of four predatory species' functional response when feeding on different stages of TSSM by Holling II functional response model (after release for 1d), the 1<sup>st</sup> repeat.

| Predatory mite species         | <i>Tetranychus urticae</i> (green) stage | Functional response model ( $N_a=$ ) | R2    | Chi-square value | P value |
|--------------------------------|------------------------------------------|--------------------------------------|-------|------------------|---------|
| <i>Amblyseius swirskii</i>     | adult                                    | $0.238N_0/(1+0.206 N_0)$             | 0.992 | 120.000          | 0.000   |
|                                | nymph                                    | $1.346 N_0/(1+0.751 N_0)$            | 0.751 | 83.905           | 0.000   |
|                                | egg                                      | $1.178 N_0/(1+0.506 N_0)$            | 0.767 | 49.699           | 0.002   |
| <i>Neoseiulus cucumeris</i>    | adult                                    | $0.238 N_0/(1+0.329 N_0)$            | 0.783 | 0.000            | 0.000   |
|                                | nymph                                    | $0.759 N_0/(1+0.289 N_0)$            | 0.925 | 50.400           | 0.000   |
|                                | egg                                      | $0.928 N_0/(1+0.186 N_0)$            | 0.922 | 71.429           | 0.000   |
| <i>Neoseiulus barkeri</i>      | adult                                    | $0.246 N_0/(1+0.241 N_0)$            | 0.988 | 90.000           | 0.000   |
|                                | nymph                                    | $0.925 N_0/(1+0.561 N_0)$            | 0.873 | 40.000           | 0.000   |
|                                | egg                                      | $0.808 N_0/(1+0.343 N_0)$            | 0.879 | 40.000           | 0.000   |
| <i>Neoseiulus californicus</i> | adult                                    | $0.246 N_0/(1+0.241 N_0)$            | 0.985 | 93.333           | 0.000   |
|                                | nymph                                    | $0.925 N_0/(1+0.561 N_0)$            | 0.965 | 98.800           | 0.000   |
|                                | egg                                      | $0.808 N_0/(1+0.343 N_0)$            | 0.826 | 61.200           | 0.000   |

**Table S2.** Parameter estimates of four predatory species' functional response when feeding on different stages of TSSM by Holling II functional response model (after release for 1d), the 2<sup>nd</sup> repeat.

| Predatory mite species         | <i>Tetranychus urticae</i> (green) stage | Functional response model ( $N_a=$ ) | $R^2$ | Chi-square value | $P$ value |
|--------------------------------|------------------------------------------|--------------------------------------|-------|------------------|-----------|
| <i>Amblyseius swirskii</i>     | adult                                    | 0.204N/(1+0.048N)                    | 0.977 | 84.308           | 0.000     |
|                                | nymph                                    | 0.894N/(1+0.132N)                    | 0.893 | 73.943           | 0.004     |
|                                | egg                                      | 0.605N/(1+0.027N)                    | 0.965 | 100.457          | 0.000     |
| <i>Neoseiulus cucumeris</i>    | adult                                    | 0.430N/(1+0.079N)                    | 0.963 | 64.286           | 0.002     |
|                                | nymph                                    | 0.629N/(1+0.063N)                    | 0.963 | 84.600           | 0.000     |
|                                | egg                                      | 0.835N/(1+0.043N)                    | 0.986 | 72.600           | 0.001     |
| <i>Neoseiulus barkeri</i>      | adult                                    | 0.235N/(1+0.160N)                    | 0.978 | 90.000           | 0.000     |
|                                | nymph                                    | 0.453N/(1+0.117N)                    | 0.949 | 44.970           | 0.001     |
|                                | egg                                      | 0.973N/(1+0.244N)                    | 0.875 | 56.800           | 0.002     |
| <i>Neoseiulus californicus</i> | adult                                    | 0.199N/(1+0.026N)                    | 0.973 | 66.458           | 0.000     |
|                                | nymph                                    | 1.020N/(1+0.352N)                    | 0.760 | 61.857           | 0.003     |
|                                | egg                                      | 1.098N/(1+0.146N)                    | 0.912 | 69.333           | 0.000     |

**Table S3.** Parameter estimates of four predatory species' functional response when feeding on different stages of TSSM by Holling II functional response model (after release for 1d), the 3<sup>rd</sup> repeat.

| Predatory mite species         | <i>Tetranychus urticae</i> (green) stage | Functional response model ( $N_a=$ ) | $R^2$ | Chi-square value | $P$ value |
|--------------------------------|------------------------------------------|--------------------------------------|-------|------------------|-----------|
| <i>Amblyseius swirskii</i>     | adult                                    | 0.431N/(1+0.064N)                    | 0.961 | 49.727           | 0.002     |
|                                | nymph                                    | 0.935N/(1+0.180N)                    | 0.941 | 71.000           | 0.000     |
|                                | egg                                      | 0.885N/(1+0.126N)                    | 0.946 | 73.000           | 0.001     |
| <i>Neoseiulus cucumeris</i>    | adult                                    | 0.426N/(1+0.117N)                    | 0.916 | 91.700           | 0.000     |
|                                | nymph                                    | 0.662N/(1+0.118N)                    | 0.907 | 58.800           | 0.001     |
|                                | egg                                      | 1.028N/(1+0.112N)                    | 0.920 | 69.600           | 0.011     |
| <i>Neoseiulus barkeri</i>      | adult                                    | 0.529N/(1+0.385N)                    | 0.886 | 99.500           | 0.000     |
|                                | nymph                                    | 0.703N/(1+0.172N)                    | 0.914 | 54.600           | 0.004     |
|                                | egg                                      | 0.882N/(1+0.122N)                    | 0.940 | 67.500           | 0.001     |
| <i>Neoseiulus californicus</i> | adult                                    | 0.445N/(1+0.196N)                    | 0.919 | 83.786           | 0.000     |
|                                | nymph                                    | 0.657N/(1+0.083N)                    | 0.934 | 62.700           | 0.000     |
|                                | egg                                      | 1.059N/(1+0.133N)                    | 0.917 | 59.686           | 0.023     |

**Table S4.** Parameter estimates of four predatory species' functional response when feeding on different stages of TSSM by Holling II functional response model (after release for 15d), the 1<sup>st</sup> repeat.

| Predatory mite species         | <i>Tetranychus urticae</i> (green) | Functional response equation | R2    | Chi-square value | P value |
|--------------------------------|------------------------------------|------------------------------|-------|------------------|---------|
| <i>Amblyseius swirskii</i>     | adult                              | $0.209N/(1+0.075N)$          | 0.982 | 104.933          | 0.000   |
|                                | nymph                              | $0.631N/(1+0.091N)$          | 0.939 | 79.200           | 0.000   |
|                                | egg                                | $1.064N/(1+0.097N)$          | 0.929 | 85.000           | 0.000   |
| <i>Neoseiulus cucumeris</i>    | adult                              | $0.214N/(1+0.063N)$          | 0.995 | 99.545           | 0.000   |
|                                | nymph                              | $0.645N/(1+0.096N)$          | 0.915 | 66.800           | 0.001   |
|                                | egg                                | $0.867N/(1+0.075N)$          | 0.979 | 77.357           | 0.000   |
| <i>Neoseiulus barkeri</i>      | adult                              | $0.240N/(1+0.340N)$          | 0.784 | 120.00           | 0.000   |
|                                | nymph                              | $0.466N/(1+0.234N)$          | 0.899 | 109.200          | 0.000   |
|                                | adult                              | $0.701N/(1+0.225N)$          | 0.914 | 102.600          | 0.000   |
| <i>Neoseiulus californicus</i> | adult                              | $0.853N/(1+0.491N)$          | 0.844 | 75.900           | 0.000   |
|                                | nymph                              | $1.093N/(1+0.131N)$          | 0.921 | 87.000           | 0.000   |
|                                | adult                              | $1.170N/(1+0.503N)$          | 0.820 | 49.371           | 0.000   |

**Table S5.** Parameter estimates of four predatory species' functional response when feeding on different stages of TSSM by Holling II functional response model (after release for 15d), the 2<sup>nd</sup> repeat.

| Predatory mite species         | <i>Tetranychus urticae</i> (green) | Functional response equation | <i>R</i> <sup>2</sup> | Chi-square value | <i>P</i> value |
|--------------------------------|------------------------------------|------------------------------|-----------------------|------------------|----------------|
| <i>Amblyseius swirskii</i>     | adult                              | 0.459N/(1+0.018N)            | 0.913                 | 66.400           | 0.060          |
|                                | nymph                              | 0.919N/(1+0.154N)            | 0.934                 | 62.800           | 0.000          |
|                                | egg                                | 0.731N/(1+0.029N)            | 0.930                 | 69.600           | 0.003          |
| <i>Neoseiulus cucumeris</i>    | adult                              | 0.196N/(1+0.010N)            | 0.968                 | 94.857           | 0.000          |
|                                | nymph                              | 1.171N/(1+0.308N)            | 0.821                 | 66.229           | 0.000          |
|                                | egg                                | 1.099N/(1+0.100N)            | 0.977                 | 92.200           | 0.000          |
| <i>Neoseiulus barkeri</i>      | adult                              | 0.428N/(1+0.092N)            | 0.956                 | 71.500           | 0.000          |
|                                | nymph                              | 0.663N/(1+0.105N)            | 0.930                 | 53.000           | 0.006          |
|                                | adult                              | 0.644N/(1+0.062N)            | 0.939                 | 61.257           | 0.017          |
| <i>Neoseiulus californicus</i> | adult                              | 0.197N/(1+0.010N)            | 0.963                 | 104.000          | 0.000          |
|                                | nymph                              | 0.861N/(1+0.076N)            | 0.988                 | 96.200           | 0.000          |
|                                | adult                              | 1.104N/(1+0.123N)            | 0.898                 | 77.000           | 0.000          |

**Table S6.** Parameter estimates of four predatory species' functional response when feeding on different stages of TSSM by Holling II functional response model (after release for 15d), the 3<sup>rd</sup> repeat.

| Predatory mite species         | <i>Tetranychus urticae</i> (green) | Functional response equation | <i>R</i> <sup>2</sup> | Chi-square value | <i>P</i> value |
|--------------------------------|------------------------------------|------------------------------|-----------------------|------------------|----------------|
| <i>Amblyseius swirskii</i>     | adult                              | 0.940N/(1+0.195N)            | 0.918                 | 65.829           | 0.006          |
|                                | nymph                              | 0.903N/(1+0.153N)            | 0.917                 | 67.400           | 0.000          |
|                                | egg                                | 0.608N/(1+0.030N)            | 0.947                 | 88.200           | 0.001          |
| <i>Neoseiulus cucumeris</i>    | adult                              | 0.455N/(1+0.195N)            | 0.910                 | 97.500           | 0.000          |
|                                | nymph                              | 1.046N/(1+0.228N)            | 0.852                 | 69.700           | 0.002          |
|                                | egg                                | 0.833N/(1+0.054N)            | 0.950                 | 69.200           | 0.012          |
| <i>Neoseiulus barkeri</i>      | adult                              | 0.432N/(1+0.126N)            | 0.927                 | 70.714           | 0.002          |
|                                | nymph                              | 0.657N/(1+0.112N)            | 0.959                 | 63.467           | 0.000          |
|                                | adult                              | 0.653N/(1+0.076N)            | 0.907                 | 73.600           | 0.001          |
| <i>Neoseiulus californicus</i> | adult                              | 0.438N/(1+0.164N)            | 0.913                 | 93.000           | 0.000          |
|                                | nymph                              | 0.830N/(1+0.078N)            | 0.903                 | 82.000           | 0.001          |
|                                | adult                              | 0.605N/(1+0.051N)            | 0.864                 | 83.400           | 0.000          |

**Table S7.** Multiple linear regression analysis of the attack rate ( $\alpha$ ) with predatory mite species, TSSM growth stages and predatory period.

|                          | <i>B</i> | $\beta$ | <i>t</i> | p-value | <i>f</i> | <i>R</i> <sup>2</sup> |
|--------------------------|----------|---------|----------|---------|----------|-----------------------|
| predatory mite species   | 3.199    | 2.832   | 7.619    | < 0.001 | 20.460   | 0.451                 |
| TSSM growth stages       | -1.064   | -2.908  | -7.824   | < 0.001 |          |                       |
| predatory period         | -0.006   | -0.035  | -0.394   | 0.695   |          |                       |
| attack rate ( $\alpha$ ) | 0.930    |         | 2.741    | 0.008   |          |                       |



**Table S8.** Multiple linear regression analysis of the handling time ( $T_h$ ) with predatory mite species, TSSM growth stages and predatory period.

|                         | <i>B</i> | $\beta$ | <i>t</i> | p-value | <i>f</i> | <i>R</i> <sup>2</sup> |
|-------------------------|----------|---------|----------|---------|----------|-----------------------|
| predatory mite species  | -7.860   | -1.483  | -3.278   | 0.002   | 6.443    | 0.221                 |
| TSSM growth stages      | 2.242    | 1.1306  | 2.887    | 0.005   |          |                       |
| predatory period        | 0.240    | 0.283   | 2.645    | 0.010   |          |                       |
| handling time ( $T_h$ ) | 10.109   |         | 5.373    | < 0.001 |          |                       |
